# Supplementary material
Source: publisher figshare collection journal article supplement (https://gsapubs.figshare.com/ndownloader/files/35908430)
Supplement: Supplementary file 1 [file 35908430]

## Sheet: Refmats China
Average values, precision and accuracy of replicate LA-ICP-MS trace element analyses of USGS reference glasses.
Element	Unit	BCR-2G (N=4)							BIR-1G (N=4)							BHVO-2G (N=4)							SRM 610 (N=24)
		Measure value (Averaged)	1 SD	1 RSD	Reference Values	RD	DL		Measure value (Averaged)	1 SD	1 RSD	Reference Values	RD	DL		Measure value (Averaged)	1 SD	1 RSD	Reference Values	RD	DL		Measure value (Averaged)	1 SD	1 RSD	Reference Values	RD	DL
Li	ppm	9.37605	0.928334	0.0990112	9	0.0417835	0.377853		2.9475	0.181599	0.0616112	3	-0.0174985	0.340094		4.63175	0.425342	0.0918318	4.4	0.0526705	0.311651		464.498	5.12426	0.0110318	485	-0.0422731	0.20862
Sc	ppm	34.6307	1.53268	0.0442579	33	0.0494151	0.258616		42.0776	2.01362	0.0478549	43	-0.0214521	0.267259		32.4489	1.57983	0.0486868	33	-0.0167014	0.222479		459.193	8.63097	0.018796	441	0.0412536	0.193711
V	ppm	420.273	9.26018	0.0220337	425	-0.0111214	0.133205		321.018	3.66979	0.0114317	326	-0.0152814	0.133575		316.693	2.40306	0.00758796	308	0.0282246	0.14242		453.014	1.10626	0.00244201	442	0.0249188	0.123508
Cr	ppm	16.3203	0.681462	0.0417555	17	-0.0399832	1.78829		393.803	9.68962	0.0246052	392	0.00459917	2.35301		289.18	4.70733	0.0162782	293	-0.0130379	1.87281		419.071	0.375825	0.000896805	405	0.034743	1.63833
Co	ppm	37.1793	0.837881	0.0225362	38	-0.0215977	0.143236		52.6735	1.4151	0.0268655	52	0.0129514	0.127916		43.9878	0.822909	0.0187077	44	-0.000277841	0.122364		402.234	0.409211	0.00101735	405	-0.00682971	0.0874237
Ni	ppm	10.8883	5.19466	0.477086	13	-0.162438	15.8644		161.963	15.244	0.0941199	178	-0.090094	17.3435		130.367	12.1552	0.0932381	116	0.123853	14.0361		465.896	2.91147	0.00624919	458.7	0.0156868	8.92692
Cu	ppm	18.049	0.522667	0.0289582	21	-0.140524	0.464927		112.28	5.69743	0.0507428	119	-0.0564666	0.417115		132.084	3.64416	0.0275898	127	0.0400287	0.339384		454.248	5.26592	0.0115926	430	0.0563917	0.260394
Zn	ppm	141.989	15.4666	0.108928	125	0.135912	0.649768		76.1273	10.0172	0.131585	78	-0.0240091	1.12621		113.018	10.8322	0.0958443	102	0.108023	0.900721		367.132	17.9243	0.0488224	456	-0.194885	0.567329
Ga	ppm	22.5288	0.523554	0.0232393	23	-0.0204854	0.168505		15.8031	0.87641	0.0554582	15	0.053538	0.1604		21.6855	0.474293	0.0218714	22	-0.0142961	0.155067		444.278	4.27868	0.00963062	438	0.0143344	0.0989609
Rb	ppm	50.2563	6.07288	0.120838	47	0.0692822	3.99098		0.0256663	0.0308464	1.20183	0.197	-0.869714	8.26358		21.6684	25.4279	1.1735	9.2	1.35526	5.2252		383.083	117.992	0.308006	425.7	-0.100111	12.8806
Sr	ppm	335.607	8.86331	0.0264098	342	-0.0186925	0.0262245		106.893	3.00177	0.0280819	109	-0.0193264	0.0181117		392.044	9.14711	0.0233318	396	-0.00998958	0.00540825		555.546	3.01935	0.00543492	515.5	0.0776832	0.0183227
Y	ppm	32.7622	2.95857	0.0903045	35	-0.0639376	0		13.9514	1.4254	0.102169	14.3	-0.0243753	0.0074785		23.4867	2.05474	0.0874852	26	-0.0966646	0		515.498	23.0927	0.044797	450	0.14555	0.00148871
Zr	ppm	180.443	9.31114	0.0516016	184	-0.0193327	0.224603		13.4435	0.614098	0.0456801	14	-0.0397532	0.142895		162.272	6.94328	0.0427878	170	-0.045456	0.099088		500.19	13.6913	0.0273722	440	0.136796	0.0531505
Nb	ppm	11.2469	1.68616	0.149923	12.5	-0.100249	0		0.49476	0.0505008	0.102071	0.52	-0.048538	0.012625		16.3491	2.2709	0.1389	18.3	-0.106604	0.009533		504.453	32.2714	0.0639732	419	0.203945	0.00152967
Ba	ppm	668.631	31.0001	0.0463636	683	-0.0210373	0		6.67649	0.756594	0.113322	6.5	0.027153	0.0316968		129.757	3.85607	0.0297176	131	-0.00948721	0		471.555	0.491943	0.00104324	435	0.0840351	0.0112904
La	ppm	24.1031	1.42523	0.0591308	24.7	-0.0241678	0		0.606551	0.0607178	0.100103	0.609	-0.00402176	0		14.5404	0.550027	0.0378274	15.2	-0.0433931	0		465.227	4.66002	0.0100167	457	0.0180022	0.000463458
Ce	ppm	50.419	4.13767	0.0820657	53.3	-0.0540517	0		1.75825	0.110222	0.0626887	1.89	-0.0697085	0		36.0836	2.12647	0.0589317	37.6	-0.0403309	0.005641		482.021	11.6206	0.024108	448	0.0759392	0.000353625
Pr	ppm	6.3214	0.720536	0.113984	6.7	-0.0565069	0		0.354009	0.0463922	0.131048	0.37	-0.0432196	0		4.83772	0.495029	0.102327	5.35	-0.0957527	0		480.75	21.2534	0.0442089	430	0.118023	0.000659583
Nd	ppm	26.9017	1.63989	0.0609588	28.9	-0.069147	0		2.20656	0.234984	0.106493	2.37	-0.0689622	0.0426682		23.3916	2.34715	0.100342	24.5	-0.0452409	0		463.395	12.0385	0.0259788	431	0.075163	0.0222546
Sm	ppm	6.17412	0.426157	0.0690231	6.59	-0.063108	0		1.05094	0.116701	0.111045	1.09	-0.0358385	0		5.90448	0.451944	0.0765426	6.1	-0.032053	0		480.27	13.3316	0.0277585	451	0.0649012	0.0130177
Eu	ppm	1.91511	0.142894	0.0746138	1.97	-0.0278641	0.0051495		0.514833	0.0650331	0.126319	0.517	-0.00419101	0		1.9905	0.134672	0.0676572	2.07	-0.0384068	0		483.895	11.3849	0.0235275	461	0.0496645	0.00115996
Gd	ppm	6.6587	0.495617	0.0744315	6.71	-0.00764493	0.0411407		1.70484	0.129693	0.0760736	1.85	-0.0784649	0		5.83814	0.494331	0.0846727	6.16	-0.0522497	0.0153653		446.605	3.0681	0.00686982	444	0.00586758	0.00407854
Tb	ppm	0.965162	0.0878014	0.0909706	1.02	-0.053763	0.00612275		0.345623	0.0341965	0.0989415	0.35	-0.0125057	0.004861		0.860065	0.0829009	0.0963891	0.92	-0.0651462	0		466.036	11.3632	0.0243826	443	0.0520008	0.000568583
Dy	ppm	5.86331	0.315838	0.0538668	6.44	-0.0895476	0		2.59463	0.469448	0.180931	2.55	0.0175005	0		4.81305	0.384772	0.0799434	5.28	-0.0884372	0		440.721	7.0197	0.0159278	427	0.0321332	0.00112721
Ho	ppm	1.216	0.140954	0.115917	1.27	-0.042522	0.00598925		0.524498	0.0616327	0.117508	0.56	-0.0633969	0		0.900143	0.0907797	0.10085	0.98	-0.0814865	0		450.822	3.16831	0.00702783	449	0.00405897	0.00025825
Er	ppm	3.42882	0.239404	0.0698212	3.7	-0.0732922	0		1.60247	0.326072	0.20348	1.7	-0.0573682	0		2.28849	0.283069	0.123692	2.56	-0.106057	0		468.11	18.1205	0.03871	426	0.0988491	0.00379092
Tm	ppm	0.482565	0.0725404	0.150323	0.51	-0.0537946	0		0.226537	0.0426428	0.188238	0.24	-0.0560969	0		0.273886	0.0193942	0.0708112	0.34	-0.194451	0		443.882	11.5754	0.0260776	420	0.0568621	0.000245958
Yb	ppm	3.34176	0.574072	0.171787	3.39	-0.0142301	0		1.61975	0.244525	0.150964	1.64	-0.0123448	0.0311247		1.90257	0.107044	0.0562631	2.01	-0.0534501	0.0138913		486.618	18.318	0.0376435	445	0.0935243	0.0119567
Lu	ppm	0.484957	0.0345234	0.0711886	0.503	-0.0358708	0		0.218976	0.0354247	0.161774	0.248	-0.117031	0.00518175		0.26119	0.0393826	0.150781	0.279	-0.0638342	0.00389475		471.742	16.6537	0.0353025	435	0.0844644	0.00061375
Hf	ppm	4.77582	0.468505	0.0980993	4.84	-0.0132596	0		0.579217	0.125804	0.217197	0.57	0.0161693	0		4.07918	0.279498	0.0685182	4.32	-0.0557462	0		445.395	7.28813	0.0163633	432	0.031006	0.00291783
Ta	ppm	0.713801	0.0961085	0.134643	0.78	-0.0848702	0		0.0352307	0.008185	0.232325	0.036	-0.0213681	0.0018115		1.06082	0.126326	0.119083	1.15	-0.0775472	0		490.929	17.5143	0.0356757	452	0.0861264	0.00079125
Pb	ppm	11.0904	0.533563	0.0481103	11	0.00821886	0.0255375		3.78991	0.281639	0.0743129	3.7	0.0242991	0.0262843		1.68995	0.379732	0.2247	1.7	-0.00591029	0.497889		411.667	3.12024	0.00757953	426	-0.0336451	0.0160396
Th	ppm	5.55436	0.56429	0.101594	5.9	-0.0585824	0.00214625		0.0283583	0.00827526	0.291812	0.03	-0.054725	0.009111		1.17465	0.125074	0.106478	1.22	-0.0371723	0		474.759	9.09782	0.019163	457.2	0.038405	0.00178867
U	ppm	1.71447	0.246866	0.14399	1.69	0.0144775	0.00810575		0.0151737	0.00526955	0.347281	0.023	-0.340272	0.0046855		0.418278	0.0501263	0.11984	0.403	0.0379094	0		490.04	13.6454	0.0278454	461.5	0.0618426	0.00113188
Reference values are preferred values from the GeoReM database (http://georem.mpch-mainz.gwdg.de/).
N, number of measurement; SD, Standard deviation; RSD, Relative standard deviation; RD, Relative deviation; Dl, Detection limit.
The concentrations of most trace elements agree with recommended values within 10%.
Analyses performed at China University of Geosciences, Wuhan.

## Sheet: Analyzed in China
Trace (ppm) element compositions of clinopyroxene from the Jiaohe xenoliths measured by LA-ICP-MS.
Sample			17DSH01			17DSH02				17DSH03			17DSH04					17DSH05				17DSH06					17DSH07				17DSH08				17DSH09			17DSH10				17DSH11				17DSH12			17DSH13
Rock type			Lherzolite			Lherzolite				Lherzolite			Lherzolite					Lherzolite				Lherzolite					Lherzolite				Lherzolite				Lherzolite			Lherzolite				Lherzolite				Lherzolite			Lherzolite
Analysis	DL		Cpx-01	Cpx-02		Cpx-01	Cpx-02	Cpx-03		Cpx-01	Cpx-02		Cpx-01	Cpx-02	Cpx-03	Cpx-04		Cpx-01	Cpx-02	Cpx-03		Cpx-01	Cpx-02	Cpx-03	Cpx-04		Cpx-01	Cpx-02	Cpx-03		Cpx-01	Cpx-02	Cpx-03		Cpx-01	Cpx-02		Cpx-01	Cpx-02	Cpx-03		Cpx-01	Cpx-02	Cpx-03		Cpx-01	Cpx-02		Cpx-01
Li	0.1988		2.57221	2.71936		1.38592	2.6755	1.77334		1.27771	1.82748		2.21858	1.59911	2.12419	2.14571		1.91743	1.47959	2.05486		3.09939	2.64251	4.53292	4.66878		1.42568	1.98717	1.64228		4.75434	3.66909	2.24019		2.36257	3.28801		1.60603	2.48551	2.16362		1.95958	2.43209	2.02677		2.94794	1.51734		2.76134
Sc	0.218213		59.7424	59.2049		60.9958	65.4287	59.586		68.1146	65.2935		64.5395	62.3923	60.7974	60.9881		62.6731	66.8843	68.0772		66.146	62.437	66.5228	77.0415		60.5599	65.1374	65.9261		67.8307	63.8073	66.0121		61.5083	64.5286		58.2639	60.8673	57.5832		56.8317	62.4032	65.0573		69.2057	65.5361		69.3966
Ti	1.0129		2817.58	2722.01		4104.14	3884.7	3930.49		3051.29	3430.86		2852.64	2819.19	2919.55	3066.19		2977.76	3057.72	2914.23		1984.41	1862.09	1848.15	2122.72		2588.37	2505.89	2662.48		2843.52	3100.54	3169.54		1161.82	1159.03		3486.86	3554.03	3201.49		1501.79	1565.13	1821.58		1433.52	1494.21		1127.35
V	0.120249		249.229	244.134		260.936	288.178	270.607		279.656	262.707		276.816	278.305	280.072	299.569		261.587	269.908	267.459		269.219	259.441	260.022	271.079		267.329	267.789	268.65		268.865	274.493	261.69		242.288	249.152		246.155	250.872	229.155		230.459	238.237	256.856		268.348	264.859		259.919
Cr	1.33825		6797.06	6561.27		4630.24	4076.07	4810.5		5285.65	5419.72		5208.84	5482.15	5135.98	5425.65		6641.05	6762.03	6389.59		4530.07	4728.58	4706.42	4446.16		5690.54	4810.5	5350.88		4288.96	5389.06	5398.65		5301.43	5159.57		5114.07	4839.52	4325.23		4972.2	4976.44	5521.78		5540.31	5889.37		5102.85
Co	0.070851		16.5347	17.3848		19.7763	20.9279	20.5681		23.2468	20.507		17.3625	18.7125	16.2014	17.2905		17.4665	16.2476	17.8147		16.0043	19.115	17.6288	16.0708		19.2512	19.9322	20.3692		19.0983	18.5397	18.2785		21.3418	22.1011		21.454	17.8802	16.4438		17.0969	17.9809	18.8629		19.2629	18.1927		18.601
Ni	5.15896		269.523	279.852		335.47	359.894	355.165		353.82	358.164		274.592	292.957	294.266	273.465		286.412	295.464	293.462		303.933	318.889	303.556	285.523		326.18	352.649	354.935		337.5	331.248	319.046		368.225	396.568		447.024	330.605	345.774		325.537	336.684	324.009		312.309	319.312		317.058
Cu	0.130596		0.386568	0.387231		1.2527	1.28789	1.07139		5.14701	1.50417		0.693581	0.53565	0.667036	0.766436		0.62125	0.433242	0.724744		0.872297	0.349085	0.586081	1.41441		0.862321	0.92709	0.935355		3.13622	1.70914	1.371		1.09996	1.5383		21.8691	0.706185	0.803804		0.790087	0.754397	0.687823		0.951688	0.561053		0.651692
Zn	0.377803		4.18692	4.8785		6.2578	7.17833	7.30618		7.64749	8.34396		4.07621	4.57156	5.60799	4.29876		5.51164	5.02888	4.91048		3.49386	4.25525	3.43711	3.99137		6.98759	7.14711	6.35793		6.54418	5.1434	6.57564		7.25276	8.83161		5.74027	6.18856	5.04635		4.78758	5.45371	4.06672		5.39682	4.71735		5.11033
Ga	0.066934		3.25375	3.76733		4.47117	4.22668	4.97272		3.62097	4.05679		4.02739	4.18108	3.45227	4.04135		3.90372	3.46845	3.8001		2.75065	3.27626	3.18289	2.81681		3.63311	3.09953	3.3667		3.81944	3.80664	3.77164		2.70763	2.58828		4.55547	3.87384	3.452		2.96229	2.93875	3.21033		3.26272	3.29984		2.38027
Rb	15.167		<DL	<DL		<DL	<DL	<DL		<DL	<DL		<DL	<DL	<DL	<DL		<DL	<DL	<DL		<DL	<DL	<DL	<DL		<DL	<DL	<DL		<DL	<DL	<DL		<DL	<DL		<DL	<DL	<DL		<DL	<DL	<DL		<DL	<DL		<DL
Sr	0.050569		39.1497	39.2583		81.3758	88.1742	92.3549		46.1792	74.4732		83.5664	86.594	85.9281	89.3669		76.971	74.8094	76.4484		43.6213	50.3542	47.1699	43.6543		42.0649	42.2588	40.3719		46.3241	47.426	45.2851		2.52186	2.77664		69.8531	69.057	64.4699		4.88399	5.1496	5.25642		12.9052	11.9934		15.7864
Y	0.012268		17.0814	16.2094		20.9535	21.4537	23.9762		19.5331	20.1296		17.2646	17.4968	16.3909	17.4099		17.4397	19.308	18.9626		12.5316	11.8549	12.8914	14.731		16.04	15.0134	15.5906		17.4661	17.2674	18.5915		11.568	11.7886		18.3799	18.1579	17.0829		13.5168	14.2644	15.3139		14.8428	15.2786		10.8224
Zr	0.105173		18.1627	17.7135		37.4285	38.5213	39.4463		27.4843	33.5139		18.4872	18.2962	19.4278	18.9742		28.7017	32.2707	30.4191		5.77535	5.68694	5.1425	6.4406		18.7119	17.9703	20.0781		22.2604	20.634	23.8663		1.37214	1.13986		33.1567	32.8392	30.4681		2.93043	2.30032	2.74575		1.99865	2.14776		1.87089
Nb	0.014428		0.046833	0.073436		0.019145	<DL	0.034847		0.227135	0.079542		0.507916	0.653051	0.465265	0.534846		0.132896	0.076086	0.12484		0.379883	0.606669	0.478651	0.310298		0.015152	<DL	0.015142		<DL	<DL	<DL		0.085085	0.104177		0.138054	0.115707	0.124323		0.169881	0.100524	0.174366		0.042116	0.041028		0.191422
Ba	0.089609		<DL	<DL		<DL	<DL	<DL		1.50705	<DL		<DL	<DL	0.150233	<DL		<DL	<DL	<DL		<DL	<DL	<DL	<DL		<DL	<DL	<DL		<DL	<DL	<DL		<DL	<DL		<DL	<DL	<DL		<DL	<DL	<DL		<DL	<DL		<DL
La	0.007533		0.343606	0.310823		1.031	1.03709	1.11568		0.780774	0.851124		1.71147	1.8161	1.8888	1.87985		1.33329	1.41026	1.48362		2.51105	2.63557	2.70211	2.46752		0.382136	0.38445	0.365946		0.659734	0.207447	0.360359		0.104157	0.120169		1.19781	1.16836	1.11376		0.152211	0.181529	0.156317		0.142137	0.130224		0.173628
Ce	0.007756		1.76642	1.655		4.4953	5.05215	5.27125		3.1848	3.2728		5.37769	5.61937	5.90016	6.6921		5.02404	4.71533	5.02576		6.1646	6.51338	6.18908	5.68108		1.94917	1.75264	1.71445		2.37245	1.60893	1.4403		0.290397	0.249635		4.36194	4.18419	3.64167		0.494652	0.459166	0.483801		0.401861	0.423041		0.438201
Pr	0.007174		0.465728	0.407284		0.852387	1.03521	1.02127		0.651769	0.662715		0.939263	0.831368	1.00126	1.14391		0.87571	0.894891	0.828497		0.703393	0.714113	0.767838	0.727056		0.41772	0.369174	0.382183		0.45287	0.413738	0.370214		0.040252	0.041006		0.744654	0.675159	0.633584		0.09823	0.103276	0.130912		0.0704	0.114684		0.078047
Nd	0.054638		3.0645	3.32593		5.4808	5.67746	6.88557		4.08724	3.82068		4.72093	4.62832	5.62703	4.92742		4.9734	4.52352	4.93497		3.1258	3.11959	3.26465	3.33853		2.5889	2.79875	2.5394		3.01261	2.68979	2.58161		0.368886	0.309635		4.69064	3.83518	3.9106		0.807165	0.901935	0.841109		0.766114	0.871496		0.538234
Sm	0.049484		1.4291	1.43879		2.1589	2.0752	2.69497		1.73899	1.73755		1.54111	1.59823	1.84962	1.6495		1.57007	1.77361	1.77014		0.971041	1.09957	1.13884	1.0813		1.19329	1.03111	1.214		1.25038	1.37085	1.15108		0.408942	0.38031		1.63013	1.56865	1.46835		0.590549	0.752385	0.952243		0.798454	0.744928		0.466775
Eu	0.018702		0.680251	0.596291		0.894555	1.0232	1.071		0.68312	0.698957		0.659958	0.722427	0.864541	0.933161		0.735018	0.766997	0.791079		0.502955	0.401417	0.49781	0.426953		0.520072	0.501546	0.50178		0.590032	0.619232	0.569177		0.214354	0.200688		0.734492	0.721619	0.587395		0.334169	0.350623	0.360741		0.303665	0.409866		0.209629
Gd	0.050942		2.34669	2.16597		2.83602	3.15054	3.56683		2.37827	2.47383		2.05649	2.24706	2.33034	2.41875		2.13468	2.51904	2.38009		1.67592	1.51533	1.57107	1.77507		1.9314	1.63075	1.75431		2.10882	1.83644	1.88974		0.972387	1.0152		2.40649	2.05892	2.09745		1.48415	1.42996	1.54098		1.36638	1.38645		0.824548
Tb	0.006987		0.431242	0.451547		0.552089	0.709279	0.624764		0.492564	0.466872		0.408206	0.415551	0.431073	0.514734		0.41882	0.488558	0.4608		0.32478	0.28781	0.348937	0.327755		0.311585	0.339205	0.346118		0.403013	0.375887	0.357611		0.216185	0.238651		0.41801	0.405432	0.365318		0.264655	0.342589	0.353307		0.387583	0.37561		0.196869
Dy	0.024461		2.86167	2.65325		3.46964	4.66581	4.72311		3.19432	3.08398		2.81932	2.91553	2.89719	3.12949		2.72637	3.07652	3.14884		2.17531	2.13995	2.22896	2.49028		2.52984	2.2183	2.35625		2.73651	2.68253	2.60046		1.6696	2.07926		2.85235	2.87868	2.54944		2.42987	2.40333	2.91159		2.69402	2.93032		1.69373
Ho	0.005979		0.572399	0.609657		0.793027	0.93931	1.06178		0.693418	0.657374		0.583915	0.58704	0.637736	0.72123		0.618224	0.638998	0.618927		0.488794	0.44535	0.42693	0.476167		0.529566	0.471862	0.497372		0.580476	0.62029	0.537246		0.410928	0.422221		0.57744	0.564409	0.544376		0.544911	0.618109	0.641574		0.562799	0.626565		0.371515
Er	0.018425		1.85751	1.62972		2.42151	2.85523	3.18104		2.0499	2.18796		1.8757	1.9876	2.15773	2.28633		1.67957	1.93956	2.12284		1.44473	1.25792	1.23546	1.49159		1.66954	1.50796	1.64659		1.73492	1.73208	1.75594		1.32346	1.47539		1.90103	1.90856	1.74764		1.6336	1.87946	2.045		2.29786	2.17029		1.26942
Tm	0.005851		0.229011	0.207648		0.32173	0.322522	0.444599		0.262549	0.28412		0.237185	0.269823	0.300346	0.26936		0.227921	0.284804	0.317454		0.169938	0.154864	0.196644	0.212152		0.229199	0.206007	0.212472		0.215606	0.258303	0.240949		0.188369	0.23523		0.276093	0.21349	0.214298		0.248642	0.246976	0.285124		0.264672	0.302885		0.166236
Yb	0.039367		1.53812	1.42582		2.42905	2.93625	3.05167		1.99435	1.95875		1.8063	1.80839	2.23701	2.21184		1.58361	1.88603	1.95028		1.24577	1.24786	1.16349	1.35713		1.59269	1.61901	1.48558		1.65809	1.75067	1.73456		1.27908	1.50663		1.92169	1.57999	1.6077		1.49577	1.66659	1.93282		2.15434	2.26665		1.25874
Lu	0.005451		0.249168	0.197996		0.359128	0.394967	0.497972		0.264847	0.295599		0.234414	0.276717	0.278747	0.284222		0.259576	0.268336	0.275174		0.176366	0.149562	0.165225	0.189618		0.212027	0.182895	0.209599		0.277435	0.239797	0.253238		0.19119	0.235444		0.260432	0.246202	0.215427		0.212938	0.26153	0.307992		0.280324	0.329204		0.188184
Hf	0.023196		0.683384	0.527561		1.20767	1.64165	1.42617		0.965012	1.10012		0.632379	0.68708	0.750912	0.712804		0.839091	0.904492	0.945948		0.181978	0.260004	0.255249	0.27464		0.678792	0.547004	0.624978		0.675664	0.629258	0.645304		0.140243	0.121882		0.949241	0.897434	0.745217		0.187549	0.324078	0.294914		0.221985	0.263035		0.17548
Ta	0.005743		0.007764	0.008815		0.006395	<DL	0.009604		0.024978	0.014461		0.085313	0.075397	0.083561	0.093861		0.015579	0.020175	0.014006		0.106809	0.08966	0.079124	0.079356		<DL	0.006521	0.006261		<DL	<DL	<DL		0.006239	0.014534		0.01563	0.009916	0.012919		0.011112	0.012876	0.017905		0.006266	0.008894		<DL
Pb	0.021074		<DL	<DL		0.130337	0.122665	0.150963		<DL	0.062621		0.172181	0.172202	0.228184	0.26181		0.162868	0.218913	0.189978		0.290578	0.247793	0.202317	0.259577		0.041342	<DL	<DL		<DL	0.025372	0.037503		<DL	<DL		0.039555	<DL	0.022614		<DL	<DL	<DL		0.029858	0.050756		<DL
Th	0.012052		0.018286	<DL		<DL	<DL	<DL		0.028673	<DL		0.096649	0.104526	0.109511	0.134591		0.017621	0.023026	0.040554		0.216652	0.238784	0.201326	0.212703		<DL	<DL	<DL		0.035192	<DL	<DL		0.019813	<DL		<DL	0.01694	<DL		<DL	0.016174	0.017422		<DL	0.015853		0.017525
U	0.008635		<DL	<DL		<DL	<DL	<DL		0.017305	0.009025		0.024427	0.037438	0.044817	0.050485		<DL	<DL	0.017676		0.055938	0.050817	0.051063	0.063075		<DL	<DL	<DL		0.015267	<DL	<DL		<DL	<DL		0.012915	<DL	<DL		<DL	<DL	<DL		<DL	<DL		<DL
(La/Yb)n			0.151757	0.14809		0.288337	0.239939	0.248358		0.265951	0.295184		0.643662	0.682221	0.57358	0.577358		0.571943	0.507958	0.516777		1.36928	1.43479	1.57767	1.23514		0.162991	0.161313	0.16734		0.270295	0.0804969	0.141132		0.0553182	0.0541829		0.423431	0.502344	0.470613		0.0691288	0.0739936	0.0549406		0.04482	0.0390287		0.0937047
Ti/Eu			4141.97	4564.9		4587.91	3796.64	3669.91		4466.69	4908.54		4322.45	3902.39	3376.99	3285.8		4051.27	3986.62	3683.86		3945.51	4638.8	3712.57	4971.79		4976.94	4996.33	5306.07		4819.27	5007.07	5568.64		5420.1	5775.27		4747.31	4925.07	5450.33		4494.12	4463.85	5049.54		4720.74	3645.6		5377.81
DL, detection limit; Cpx, clinopyroxene.
Analyses performed at China University of Geosciences, Wuhan.
[truncated: 29 more columns]

## Sheet: Analyzed in Germany
Trace element compositions (ppm) of clinopyroxene from the Jiaohe xenoliths measured by LA-ICP-MS using low resolution.
Sample			17DSH02										17DSH04										17DSH06										17DSH09										17DSH10
Rock type			Lherzolite										Lherzolite										Lherzolite										Lherzolite										Lherzolite
Analysis	DL		Cpx1-1	Cpx1-2	Cpx1-3	Cpx2-1	Cpx2-2	Cpx2-3	Cpx3-1	Cpx3-2	Cpx3-3		Cpx1-1	Cpx1-2	Cpx1-3	Cpx2-1	Cpx2-2	Cpx2-3	Cpx3-1	Cpx3-2	Cpx3-3		Cpx1-1	Cpx1-2	Cpx1-3	Cpx2-1	Cpx2-2	Cpx2-3	Cpx3-1	Cpx3-2	Cpx3-3		Cpx1-1	Cpx1-2	Cpx1-3	Cpx2-1	Cpx2-2	Cpx2-3	Cpx3-1	Cpx3-2	Cpx3-3		Cpx1-1	Cpx1-2	Cpx1-3	Cpx2-1	Cpx2-2	Cpx2-3	Cpx3-1
Li7	0.249019		2.29	2.36	2.43	2.22	1.88	1.69	2.4	1.82	2.02		2.94	2.32	2.52	1.97	1.7	1.9	2.95	2.82	2.45		5.36	5.33	5.08	3.21	4.45	4.3	4.31	3.5	3.27		2.84	1.31	1.11	3.27	1.5	1.47	2.87	2.84	2.79		3.53	2.99	2.83	2.92	2.68	2.53	2.79
Sc45	0.0836685		69.29	68.15	69.26	69.56	64.87	64.42	69.63	61.45	64.74		78.39	63.77	64.08	66.09	61.91	62.61	66.54	66.67	63.79		80.31	70.15	70.44	79.66	69.5	68.22	73.7	67.33	68.51		67.17	60.51	60.17	67.72	64.02	64.4	66.97	66.55	67.22		70.82	65.71	66.33	69.12	64.6	67.2	69.49
Ti49	0.550167		4109.41	4296.02	4261.04	4274.61	4409.3	4442.12	4097.85	4020.64	4171.96		3344.98	3012.01	3021.94	2932.89	2816.25	2838.46	2928.09	3013.09	2941.34		2080.67	1903.37	1907.65	2277.4	2011.19	1953.69	1987.1	1894.88	1934.44		1196.39	1238.7	1225.49	1159.87	1275.41	1272.28	1151.81	1228.59	1248.07		3859.73	3791.14	3804.25	3727.4	3864.56	3918.56	3789.19
V51	0.049413		292.02	289.74	292.7	293.76	282.63	283.1	292.96	275.39	284.37		308.39	287.6	286.28	289.9	281.97	288.29	295.06	298.41	290.76		289	279.75	279.28	294.43	286.52	283.15	283.61	281.26	287.56		264.98	266.56	264.14	257.55	265.72	268.05	255.85	265.39	266.76		288.16	280.48	281.94	288.03	277.87	283.22	289.42
Cr53	1.12399		4429.91	4644.21	4576.44	4296.69	5155.1	5145.94	4326.44	5002.03	4905.99		5037.7	5781.73	5728.99	5239.57	5422.68	5533.57	5615.91	5722.58	5746.61		4322.34	4790.13	4697.48	4850.03	4977.49	4895.47	4414.28	4915.29	4972.02		5173.41	6326.52	6177.93	4529.27	5998.35	5906.65	4358.71	5397.65	5427.96		4662.44	5197.66	5275.79	4322.13	5044.29	5027.38	4419.53
Mn55	0.782093		789.5	764.83	758.01	764.47	741.73	740.41	759.48	767.33	749.99		631.25	722.05	715.67	759.37	748.48	730.65	689.03	686.81	696.58		634.19	658.42	665.82	604.59	645.95	643.94	671.12	679.54	683.22		676.39	681.4	668.51	650.56	667.9	661.42	661.66	661.74	656.11		674.74	674.93	684.94	671.35	653.03	655.99	683.02
Co59	0.0500898		23.85	22.1	22.05	21.97	21.61	21.77	22.1	21.16	21.15		17.23	18.89	19.44	20.81	20.24	19.57	18.8	18.9	19.52		18.43	19.2	20.83	18.12	19.07	19.47	20.22	20.52	21.32		22.82	22.47	22.15	22.68	22.79	22.47	22.81	22.7	22.49		20.86	20.56	20.73	20.72	20.23	20.44	21.41
Ni60	0.861843		453.47	389.82	388.19	382.66	378.93	377.66	381.68	374.96	380.74		302.88	310.5	310.28	325.74	329.53	346.82	299.26	299.2	303.49		318.78	329.05	359.07	325.35	332	332.09	329.52	340.53	346.39		388.96	385.87	381.21	387.4	385.99	387.51	395.29	392.35	396.26		349.82	343.64	346.93	344.74	341.98	343.75	345.21
Cu63	0.0750935		11.78	1.346	1.225	1.212	1.19	1.311	1.222	1.288	1.396		0.538	0.521	0.564	0.587	0.623	4.95	0.869	0.58	0.518		1.809	1.481	6.44	1.063	1.222	1.318	0.646	0.57	0.637		1.65	1.078	1.128	1.963	1.035	1.076	1.751	1.341	1.262		1.857	1.262	1.257	1.442	1.017	0.971	1.598
Zn66	0.243361		7.57	7.49	7.4	7.2	7.56	7.53	7.64	7.39	7.92		3.94	4.72	5.25	5.6	5.19	4.73	4.98	4.59	5.1		4.53	4.36	5.18	4.65	4.44	4.96	5.55	5.79	5.75		8.95	8.7	9.03	9.12	9.03	9.14	8.75	8.9	9.17		7.43	7.51	7.93	7.82	7.7	7.81	7.43
Ga69	0.0531426		4.06	3.86	3.88	3.7	4.08	4.08	3.94	4.36	4.07		3.03	3.62	3.45	3.68	3.86	3.96	3.44	3.31	3.48		2.19	2.71	2.8	2.34	2.63	2.54	2.42	2.89	2.86		2.23	2.65	2.5	2.16	2.45	2.41	2.02	2.27	2.4		3.39	3.47	3.62	3.04	3.3	3.26	3.35
Rb85	0.0267194		<DL	<DL	0.038	<DL	<DL	<DL	<DL	<DL	<DL		<DL	<DL	<DL	0.034	<DL	0.081	<DL	<DL	<DL		<DL	<DL	0.05	<DL	<DL	<DL	<DL	<DL	<DL		<DL	0.034	0.031	<DL	<DL	<DL	<DL	<DL	<DL		<DL	<DL	<DL	<DL	<DL	<DL	<DL
Sr88	0.0124911		79.82	80.04	79.69	81.28	79.2	79.55	81.02	81.14	82.15		73.59	80.31	78.19	79.17	80.43	81.46	78.15	78.57	75.81		45.98	46.31	44.75	41.3	46.67	43.6	47.8	48.6	47.77		2.45	2.44	2.33	10.54	2.36	2.37	2.46	2.37	2.46		69.02	68.23	69.29	69.16	65.75	67.45	70.21
Y89	0.0032299		19.47	19.39	19.57	19.38	19.73	20.21	19.25	19.85	20.26		18.06	17.34	17	16.31	16.2	16.23	16.03	16.01	15.46		12.41	12.14	12.06	13.69	13.02	12.13	12.34	12.03	12.07		10.61	11.24	11.04	10.11	10.94	10.84	9.91	10.21	10.7		17.81	17.97	18.1	16.95	16.77	17.13	17.47
Zr90	0.00698		35.17	35.18	35.48	35.12	35.15	35.63	34.56	33.31	34.3		20.52	17.78	17.53	17.63	16.85	17.25	21.02	21.53	20.53		5.47	5.22	5.15	6.45	5.25	5.14	5.3	4.78	4.97		1.052	1.086	1.088	1.042	1.101	1.084	0.98	1.063	1.105		32.34	31.02	31.57	30.77	30.83	31.38	31.45
Nb93	0.00289451		0.0553	0.0311	0.0327	0.0354	0.0365	0.0355	0.0425	0.0492	0.0465		0.234	0.465	0.428	0.549	0.61	0.607	0.662	0.571	0.586		0.369	0.485	0.527	0.296	0.487	0.473	0.503	0.635	0.646		0.115	0.132	0.139	0.231	0.121	0.127	0.099	0.107	0.108		0.132	0.148	0.133	0.135	0.117	0.131	0.128
Ba137	0.0245458		<DL	<DL	<DL	0.058	0.053	<DL	<DL	<DL	<DL		<DL	<DL	<DL	<DL	<DL	0.037	0.118	<DL	0.044		0.034	<DL	0.069	<DL	<DL	<DL	<DL	<DL	<DL		<DL	<DL	<DL	0.045	<DL	<DL	<DL	0.042	<DL		<DL	<DL	<DL	0.042	<DL	<DL	0.058
La139	0.00223206		0.899	0.851	0.88	0.875	0.852	0.924	0.876	0.924	0.945		1.609	1.76	1.75	1.618	1.68	1.72	1.509	1.558	1.528		2.37	2.64	2.59	2.49	2.66	2.57	2.67	2.78	2.69		0.1043	0.0985	0.1043	0.642	0.0986	0.1068	0.0998	0.1127	0.121		1.205	1.218	1.17	1.124	1.101	1.142	1.142
Ce140	0.00290689		3.89	3.83	3.84	3.86	3.84	3.95	4	4.12	4.03		5.26	5.58	5.39	5.03	5.06	5.12	4.56	4.59	4.53		5.63	5.93	5.98	5.97	6.26	6.03	6.23	6.41	6.33		0.263	0.295	0.248	0.806	0.27	0.26	0.241	0.26	0.272		4.18	4.21	4.25	4.09	4.04	4.02	4.19
Pr141	0.00151136		0.775	0.741	0.734	0.735	0.754	0.766	0.739	0.778	0.81		0.843	0.881	0.862	0.758	0.811	0.778	0.739	0.738	0.707		0.632	0.684	0.655	0.72	0.718	0.68	0.712	0.753	0.737		0.0413	0.0502	0.041	0.0754	0.0364	0.0358	0.0336	0.0399	0.0405		0.74	0.708	0.73	0.691	0.66	0.673	0.711
Nd146	0.00628424		4.74	4.85	4.9	4.7	4.81	5.12	4.79	4.97	5.1		4.64	4.89	4.95	4.51	4.41	4.45	4.02	4.14	3.9		2.95	3.07	3.03	3.18	3.2	3.1	3.13	3.23	3.16		0.336	0.364	0.343	0.339	0.342	0.374	0.319	0.353	0.388		4.31	4.14	4.11	4.09	3.92	4.12	4.14
Sm147	0.00712179		1.84	2.07	1.97	1.88	1.86	2.02	1.78	2.01	2.1		1.79	1.76	1.82	1.62	1.58	1.63	1.47	1.58	1.56		1.073	1.06	1.118	1.22	1.113	1.083	1.132	1.095	1.071		0.366	0.333	0.332	0.384	0.363	0.384	0.361	0.348	0.407		1.64	1.73	1.73	1.48	1.63	1.64	1.63
Eu151	0.00225797		0.786	0.793	0.816	0.76	0.758	0.79	0.784	0.797	0.824		0.722	0.713	0.694	0.663	0.635	0.641	0.624	0.602	0.614		0.443	0.447	0.442	0.429	0.488	0.43	0.418	0.469	0.473		0.176	0.19	0.204	0.184	0.209	0.172	0.177	0.177	0.179		0.658	0.672	0.717	0.601	0.631	0.654	0.68
Gd157	0.0117399		2.58	2.64	2.59	2.69	2.68	2.75	2.52	2.84	2.86		2.17	2.39	2.34	2.21	2.2	2.24	1.91	2.02	2.13		1.63	1.62	1.75	1.75	1.68	1.65	1.66	1.83	1.71		0.99	0.928	0.951	0.941	0.977	0.927	0.922	0.872	0.937		2.36	2.47	2.3	2.14	2.24	2.21	2.34
Tb159	0.0011773		0.475	0.472	0.462	0.471	0.467	0.491	0.464	0.499	0.499		0.424	0.404	0.412	0.395	0.381	0.396	0.363	0.361	0.377		0.306	0.323	0.309	0.332	0.318	0.321	0.323	0.329	0.325		0.193	0.213	0.217	0.199	0.208	0.207	0.188	0.184	0.196		0.423	0.418	0.44	0.4	0.385	0.403	0.413
Dy161	0.00608674		3.45	3.41	3.62	3.56	3.67	3.77	3.57	3.75	3.76		3.3	3.21	2.93	2.87	2.99	2.93	2.73	2.92	2.83		2.32	2.47	2.33	2.56	2.42	2.34	2.28	2.31	2.4		1.57	1.83	1.77	1.66	1.94	1.8	1.66	1.76	1.7		3.05	3.15	3.14	2.93	2.97	2.99	3.18
Ho165	0.00114797		0.776	0.762	0.764	0.742	0.754	0.768	0.755	0.767	0.801		0.685	0.699	0.653	0.644	0.632	0.647	0.587	0.633	0.658		0.485	0.49	0.465	0.542	0.513	0.474	0.486	0.484	0.499		0.404	0.434	0.452	0.411	0.426	0.427	0.385	0.403	0.412		0.667	0.659	0.669	0.639	0.636	0.651	0.658
Er167	0.00446128		2.26	2.26	2.18	2.32	2.31	2.28	2.18	2.33	2.36		2.17	2.05	1.93	1.81	1.81	1.88	1.78	2.01	1.86		1.35	1.4	1.36	1.62	1.44	1.38	1.41	1.54	1.33		1.28	1.34	1.35	1.24	1.34	1.4	1.29	1.36	1.3		2.11	2.12	2.08	1.88	1.83	1.9	1.99
Tm169	0.00114277		0.312	0.303	0.295	0.288	0.315	0.33	0.3	0.339	0.338		0.325	0.312	0.284	0.271	0.256	0.264	0.269	0.278	0.271		0.2	0.207	0.209	0.224	0.203	0.194	0.205	0.197	0.182		0.181	0.207	0.201	0.187	0.212	0.19	0.178	0.169	0.207		0.274	0.285	0.294	0.269	0.262	0.286	0.297
Yb172	0.00776943		2.14	2	2.2	2.04	2.16	2.17	2.06	2.2	2.2		1.93	1.99	1.94	1.8	1.73	1.77	1.61	1.84	1.7		1.23	1.22	1.25	1.46	1.3	1.21	1.28	1.28	1.22		1.33	1.4	1.39	1.18	1.32	1.34	1.22	1.33	1.35		1.91	1.95	2	1.72	1.71	1.81	1.95
Lu175	0.00107792		0.266	0.303	0.295	0.3	0.32	0.316	0.299	0.326	0.326		0.281	0.262	0.276	0.258	0.269	0.245	0.25	0.255	0.259		0.172	0.177	0.162	0.182	0.191	0.166	0.156	0.161	0.15		0.18	0.19	0.197	0.155	0.196	0.186	0.18	0.18	0.185		0.259	0.28	0.279	0.246	0.251	0.26	0.286
Hf177	0.00551		1.08	1.08	1.13	1.16	1.13	1.08	1.25	1.12	1.02		0.694	0.611	0.575	0.741	0.604	0.66	0.697	0.718	0.722		0.266	0.243	0.239	0.343	0.271	0.261	0.24	0.264	0.261		0.108	0.137	0.133	0.118	0.111	0.127	0.145	0.139	0.122		0.95	0.91	0.89	0.93	0.91	0.9	1.01
Ta181	0.00191875		0.0057	0.0055	0.0077	0.007	0.0048	0.0072	0.0051	0.0049	0.0049		0.0647	0.085	0.076	0.077	0.085	0.074	0.0646	0.0634	0.0472		0.082	0.103	0.098	0.098	0.111	0.105	0.099	0.114	0.107		0.0108	0.0044	0.0098	0.0136	0.007	0.0097	0.0115	0.0038	0.0047		0.0136	0.0146	0.0139	0.013	0.014	0.0201	0.0186
Pb208	0.00322858		0.106	0.097	0.095	0.0832	0.091	0.094	0.108	0.103	0.104		0.247	0.152	0.189	0.235	0.17	0.154	0.112	0.0763	0.148		0.254	0.279	0.277	0.259	0.267	0.25	0.269	0.238	0.247		0.0114	0.0051	0.008	0.0292	0.008	0.0075	0.0059	<DL	0.0052		0.0422	0.0486	0.0442	0.045	0.0354	0.0485	0.0344
Th232	0.000791429		0.004	0.0042	0.0061	0.0039	0.0055	0.0055	0.00345	0.0064	0.0043		0.08	0.107	0.11	0.146	0.128	0.097	0.091	0.098	0.094		0.18	0.25	0.277	0.183	0.24	0.266	0.233	0.268	0.26		0.0158	0.0088	0.0115	0.081	0.0145	0.0087	0.0138	0.0105	0.0129		0.0179	0.0146	0.0155	0.0164	0.0174	0.0183	0.0148
U238	0.000647692		0.0138	0.00094	0.0043	0.00159	0.0043	0.00184	0.00226	0.00319	0.0049		0.0326	0.0363	0.0358	0.0357	0.0397	0.0442	0.0313	0.0347	0.0343		0.0531	0.0661	0.072	0.0554	0.0612	0.0629	0.0604	0.062	0.068		0.0043	0.004	0.0042	0.0278	0.00237	0.00291	0.0063	0.0055	0.0055		0.0063	0.0091	0.0043	0.0036	0.0058	0.0054	0.0037
(La/Yb)n			0.28538	0.289053	0.27173	0.291377	0.267956	0.289261	0.288878	0.285316	0.291801		0.566339	0.60081	0.612793	0.610638	0.659691	0.660135	0.636709	0.575211	0.610593		1.30894	1.47001	1.40756	1.15857	1.39	1.44286	1.41703	1.47541	1.49786		0.0532734	0.0477954	0.0509738	0.369599	0.0507435	0.0541432	0.055571	0.0575638	0.0608876		0.428579	0.424317	0.397405	0.443931	0.43739	0.428613	0.397841
Ti/Eu			5228.26	5417.43	5221.86	5624.49	5817.02	5622.94	5226.85	5044.72	5063.06		4632.94	4224.42	4354.38	4423.67	4435.04	4428.17	4692.45	5005.13	4790.46		4696.77	4258.1	4315.95	5308.62	4121.29	4543.47	4753.83	4040.26	4089.73		6797.67	6519.47	6007.3	6303.64	6102.44	7396.98	6507.4	6941.19	6972.46		5865.85	5641.58	5305.79	6202	6124.5	5991.68	5572.34
DL, detection limit; Cpx, clinopyroxene.
Analyses performed at Goethe-Universität Frankfurt.
[truncated: 64 more columns]

## Sheet: Refmats Germany
Average values, precision and accuracy of replicate LA-ICP-MS trace element analyses using low resolution of reference materials.
Element	Unit	BIR-1G (N=12)
		Measure value (Averaged)	1 RSD	Reference Values	RD	DL
Li7	ppm	3.09333	0.0372012	3	0.0311111	0.127
Sc45	ppm	40.6883	0.0165203	43	-0.0537597	0.0615
Ti49	ppm	6280.81	0.054477	5400	0.163113	0.289
V51	ppm	329.123	0.0111385	326	0.00957822	0.0267
Cr53	ppm	392.19	0.0379264	392	0.000484694	0.641
Mn55	ppm	1611.81	0.269931	1471.48	0.0953596	0.621
Co59	ppm	53.7233	0.0106437	52	0.033141	0.0338
Ni60	ppm	178.529	0.0455237	178	0.00297285	0.628
Cu63	ppm	112.379	0.0208999	119	-0.0556373	0.044
Zn66	ppm	81.1292	0.0542091	78	0.0401175	0.129
Ga69	ppm	13.2392	0.0396839	15	-0.117389	0.0323
Rb85	ppm	0.1945	0.0540346	0.197	-0.0126904	0.0152
Sr88	ppm	100.091	0.0196913	109	-0.0817355	0.0101
Y89	ppm	12.2608	0.0250723	14.3	-0.142599	0.00265
Zr90	ppm	11.6967	0.0463943	14	-0.164524	0.00507
Nb93	ppm	0.493167	0.0503327	0.52	-0.0516026	0.00192
Ba137	ppm	5.92833	0.0469828	6.5	-0.0879487	0.0278
La139	ppm	0.541333	0.0316973	0.609	-0.111111	0.00182
Ce140	ppm	1.744	0.0277274	1.89	-0.0772487	0.00172
Pr141	ppm	0.328333	0.0247887	0.37	-0.112613	0.00083
Nd146	ppm	2.15333	0.0329387	2.37	-0.0914205	0.00368
Sm147	ppm	0.9885	0.0369778	1.09	-0.0931193	0.00362
Eu151	ppm	0.470083	0.0295108	0.517	-0.0907479	0.00157
Gd157	ppm	1.52767	0.0423768	1.85	-0.174234	0.00833
Tb159	ppm	0.2895	0.0353647	0.35	-0.172857	0.00103
Dy161	ppm	2.20833	0.0397513	2.55	-0.133987	0.00497
Ho165	ppm	0.47475	0.0280468	0.56	-0.152232	0.00066
Er167	ppm	1.4355	0.0371211	1.7	-0.155588	0.00236
Tm169	ppm	0.208667	0.0332232	0.24	-0.130556	0.00073
Yb172	ppm	1.47125	0.0289331	1.64	-0.102896	0.00583
Lu175	ppm	0.209	0.0291399	0.248	-0.157258	0.00087
Hf177	ppm	0.457333	0.0579668	0.57	-0.197661	0.00478
Ta181	ppm	0.0343583	0.0807389	0.036	-0.0456019	0.00158
Pb208	ppm	3.44333	0.0358335	3.7	-0.0693694	0.00271
Th232	ppm	0.0267833	0.0694471	0.03	-0.107222	0.00063
U238	ppm	0.0181667	0.0767538	0.023	-0.210145	0.0003
N, number of measurement; RSD, Relative standard deviation; RD, Relative deviation; Dl, Detection limit.
The concentrations of most trace elements agree with recommended values within 20%.
Analyses performed at Goethe-Universität Frankfurt.

## Sheet: Medians for Cpx
Median trace element compositions (ppm) for clinopyroxene in a subset of spinel peridotite xenoliths from Jiaohe.
Sample	DL	17DSH01	17DSH03	17DSH05	17DSH07	17DSH08	17DSH11	17DSH12	17DSH16
		Lherzolite	Lherzolite	Lherzolite	Lherzolite	Lherzolite	Lherzolite	Lherzolite	Lherzolite
Li	0.249019	2.64578	1.55259	1.91743	1.64228	3.66909	2.02677	2.23264	2.49516
Sc	0.0836685	59.4737	66.7041	66.8843	65.1374	66.0121	62.4032	67.3709	66.0154
Ti	0.550167	2769.8	3241.07	2977.76	2588.37	3100.54	1565.13	1463.86	2647.84
V	0.049413	246.681	271.182	267.459	267.789	268.865	238.237	266.604	250.18
Cr	1.12399	6679.17	5352.69	6641.05	5350.88	5389.06	4976.44	5714.84	6570.16
Co	0.0500898	16.9598	21.8769	17.4665	19.9322	18.5397	17.9809	18.7278	17.5633
Ni	0.861843	274.687	355.992	293.462	352.649	331.248	325.537	315.81	294.914
Cu	0.0750935	0.3869	3.32559	0.62125	0.92709	1.70914	0.754397	0.756371	0.78111
Zn	0.243361	4.53271	7.99572	5.02888	6.98759	6.54418	4.78758	5.05708	6.10588
Ga	0.0531426	3.51054	3.83888	3.8001	3.3667	3.80664	2.96229	3.28128	3.80595
Rb	0.0267194	<DL	<DL	<DL	<DL	<DL	<DL	<DL	<DL
Sr	0.0124911	39.204	60.3262	76.4484	42.0649	46.3241	5.1496	12.4493	58.7856
Y	0.0032299	16.6454	19.8314	18.9626	15.5906	17.4661	14.2644	15.0607	15.8391
Zr	0.00698	17.9381	30.4991	30.4191	18.7119	22.2604	2.74575	2.07321	24.0923
Nb	0.00289451	0.0601345	0.153338	0.12484	0.015147	<DL	0.169881	0.041572	0.075282
Ba	0.0245458	<DL	0.778673	<DL	<DL	<DL	<DL	<DL	<DL
La	0.00223206	0.327215	0.815949	1.41026	0.382136	0.360359	0.156317	0.136181	0.513618
Ce	0.00290689	1.71071	3.2288	5.02404	1.75264	1.60893	0.483801	0.412451	1.98923
Pr	0.00151136	0.436506	0.657242	0.87571	0.382183	0.413738	0.103276	0.092542	0.434948
Nd	0.00628424	3.19521	3.95396	4.93497	2.5889	2.68979	0.841109	0.818805	2.80245
Sm	0.00712179	1.43394	1.73827	1.77014	1.19329	1.25038	0.752385	0.771691	1.19244
Eu	0.00225797	0.638271	0.691038	0.766997	0.50178	0.590032	0.350623	0.356766	0.483006
Gd	0.0117399	2.25633	2.42605	2.38009	1.75431	1.88974	1.48415	1.37641	1.56548
Tb	0.0011773	0.441395	0.479718	0.4608	0.339205	0.375887	0.342589	0.381597	0.312852
Dy	0.00608674	2.75746	3.13915	3.07652	2.35625	2.68253	2.42987	2.81217	2.16306
Ho	0.00114797	0.591028	0.675396	0.618927	0.497372	0.580476	0.618109	0.594682	0.469695
Er	0.00446128	1.74362	2.11893	1.93956	1.64659	1.73492	1.87946	2.23408	1.43614
Tm	0.00114277	0.21833	0.273334	0.284804	0.212472	0.240949	0.248642	0.283779	0.22416
Yb	0.00776943	1.48197	1.97655	1.88603	1.59269	1.73456	1.66659	2.21049	1.38182
Lu	0.00107792	0.223582	0.280223	0.268336	0.209599	0.253238	0.26153	0.304764	0.202014
Hf	0.00551	0.605472	1.03256	0.904492	0.624978	0.645304	0.294914	0.24251	0.561787
Ta	0.00191875	0.0082895	0.0197195	0.015579	0.006391	<DL	0.012876	0.00758	0.011392
Pb	0.00322858	<DL	0.062621	0.189978	0.041342	0.0314375	<DL	0.040307	0.0235035
Th	0.000791429	0.018286	0.028673	0.023026	<DL	0.035192	0.016798	0.015853	<DL
U	0.000647692	<DL	0.013165	0.017676	<DL	0.015267	<DL	<DL	<DL
DL, detection limit.
Data acquired at China University of Geosciences, Wuhan.
Sample	DL	17DSH02	17DSH04	17DSH06	17DSH09	17DSH10	17DSH13	17DSH14	17DSH15	17DSH17	17DSH18	17DSH19	17DSH20
		Lherzolite	Lherzolite	Lherzolite	Lherzolite	Lherzolite	Lherzolite	Lherzolite	Lherzolite	Harzburgite	Harzburgite	Harzburgite	Harzburgite
Li	0.249019	2.22	2.45	4.31	2.79	2.79	2.55	1.94	2.04	3.12	3.95	3.83	2.27
Sc	0.0836685	68.15	64.08	70.15	66.55	66.33	64.59	61.63	64.46	95.83	110.47	132.6	75.55
Ti	0.550167	4261.04	2941.34	1953.69	1228.59	3791.14	1128.62	4301.48	2855.16	614.825	585.3	402.27	306.62
V	0.049413	289.74	289.9	283.61	265.39	281.94	256.98	280.71	276.61	336.98	379.85	383.24	196.07
Cr	1.12399	4644.21	5615.91	4850.03	5427.96	5044.29	5333.46	5750.23	5853.77	22262.1	21902.7	19641.4	8630.78
Co	0.0500898	21.97	19.44	19.47	22.68	20.56	18.55	19.49	20.04	24.61	23.72	21.05	21.26
Ni	0.861843	381.68	310.28	332	387.51	343.75	308.93	320.71	325.89	366.93	368.71	364.2	373.09
Cu	0.0750935	1.288	0.58	1.222	1.262	1.257	0.77	1.234	1.004	1.8135	1.864	2.03	2.7
Zn	0.243361	7.53	4.98	4.96	9.03	7.7	5.84	7.21	6.84	23.825	23.02	9.61	8.58
Ga	0.0531426	4.06	3.48	2.63	2.4	3.39	1.96	3.35	3.02	4.875	4.39	2.17	1.365
Rb	0.0267194	0.038	0.0575	0.05	0.0325	0.03	<DL	0.029	<DL	0.558	0.818	0.281	0.044
Sr	0.0124911	80.04	78.57	46.31	2.44	68.85	13.39	65.96	18.32	323.2	364.3	326.47	43.41
Y	0.0032299	19.57	16.23	12.14	10.7	17.81	10.02	18.62	15.63	15.015	14.1	13.96	3
Zr	0.00698	35.15	17.78	5.22	1.084	31.02	1.79	30.03	10.03	155.57	126.85	40.86	3.33
Nb	0.00289451	0.0365	0.571	0.487	0.121	0.133	0.201	0.1516	0.0291	0.369	0.35	1.229	0.315
Ba	0.0245458	0.0555	0.044	0.0515	0.0435	0.054	0.0445	0.0337	<DL	0.2965	0.921	0.6895	0.412
La	0.00223206	0.88	1.618	2.64	0.1043	1.17	0.137	0.869	0.091	6.02	6.13	10.54	1.188
Ce	0.00290689	3.89	5.06	6.03	0.263	4.18	0.376	3.56	0.731	26.955	27.62	36.32	2.45
Pr	0.00151136	0.754	0.778	0.712	0.0405	0.708	0.0637	0.678	0.228	5.165	5.18	6.07	0.267
Nd	0.00628424	4.85	4.45	3.13	0.343	4.12	0.538	4.29	1.852	29.025	30.44	29.72	1.224
Sm	0.00712179	1.97	1.62	1.095	0.363	1.64	0.382	1.707	1.082	8.525	8.3	7.48	0.378
Eu	0.00225797	0.79	0.641	0.443	0.179	0.658	0.186	0.718	0.48	2.74	2.67	2.47	0.15
Gd	0.0117399	2.68	2.2	1.68	0.937	2.34	0.887	2.56	1.88	7.555	7.19	6.5	0.461
Tb	0.0011773	0.472	0.395	0.323	0.199	0.418	0.184	0.467	0.37	0.945	0.898	0.825	0.0809
Dy	0.00608674	3.62	2.93	2.34	1.76	3.14	1.66	3.5	2.78	4.665	4.5	4.17	0.56
Ho	0.00114797	0.764	0.647	0.486	0.412	0.659	0.372	0.75	0.613	0.636	0.622	0.574	0.122
Er	0.00446128	2.28	1.88	1.4	1.34	2.08	1.2	2.21	1.83	1.1985	1.145	1.147	0.375
Tm	0.00114277	0.312	0.271	0.203	0.19	0.286	0.178	0.328	0.273	0.13275	0.122	0.1283	0.0619
Yb	0.00776943	2.16	1.8	1.25	1.33	1.91	1.24	2.2	1.86	0.6935	0.705	0.711	0.428
Lu	0.00107792	0.303	0.259	0.166	0.185	0.26	0.172	0.298	0.261	0.08995	0.087	0.0896	0.0662
Hf	0.00551	1.12	0.694	0.261	0.127	0.91	0.129	1.023	0.525	3.605	2.29	0.256	0.133
Ta	0.00191875	0.0055	0.074	0.103	0.0097	0.0146	0.0121	0.0084	<DL	0.03425	0.0373	0.1161	0.0212
Pb	0.00322858	0.097	0.154	0.259	0.00775	0.045	0.0153	0.0795	0.0238	0.1565	0.142	0.223	0.0731
Th	0.000791429	0.0043	0.098	0.25	0.0129	0.0164	0.0249	0.0246	<DL	0.0656	0.0458	0.1183	0.0839
U	0.000647692	0.00319	0.0357	0.062	0.0043	0.0049	0.0099	0.0097	<DL	0.01715	0.0193	0.0667	0.027
Data acquired at Goethe-Universität Frankfurt.
